# Supplementary material for: 3-O-trans-p-coumaroyl-alphitolic acid, a triterpenoid from Zizyphus jujuba, leads to apoptotic cell death in human leukemia cells through reactive oxygen species production and activation of the unfolded protein response
Source: PubMed Central journal article supplement (PMC5568338; doi:10.1371/journal.pone.0183712), 2017-08-23
Supplement: pone.0183712.s001.pdf [file pone.0183712.s001.pdf]

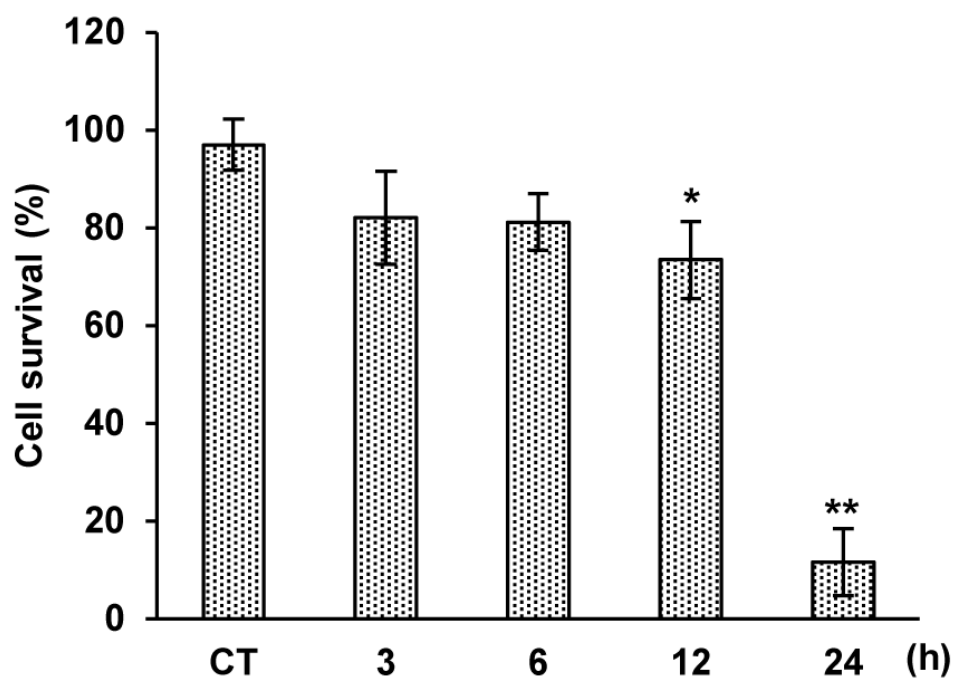

**Supplementary Fig. 1.** Assessment of cell survival. Trypan blue dye exclusion tests were performed 0, 3, 6, 12, and 24 h after treatment with 40  $\mu$ M 3OTPCA. Cell survival (%) = (live cells / total cells)  $\times$  100. The data represent the mean  $\pm$  SD (N = 3). \*\* $p$  < 0.01 vs. CT (Student's t-test).
