# Supplementary material for: 3-O-trans-p-coumaroyl-alphitolic acid, a triterpenoid from Zizyphus jujuba, leads to apoptotic cell death in human leukemia cells through reactive oxygen species production and activation of the unfolded protein response
Source: PubMed Central journal article supplement (PMC5568338; doi:10.1371/journal.pone.0183712), 2017-08-23
Supplement: pone.0183712.s002.pdf [file pone.0183712.s002.pdf]

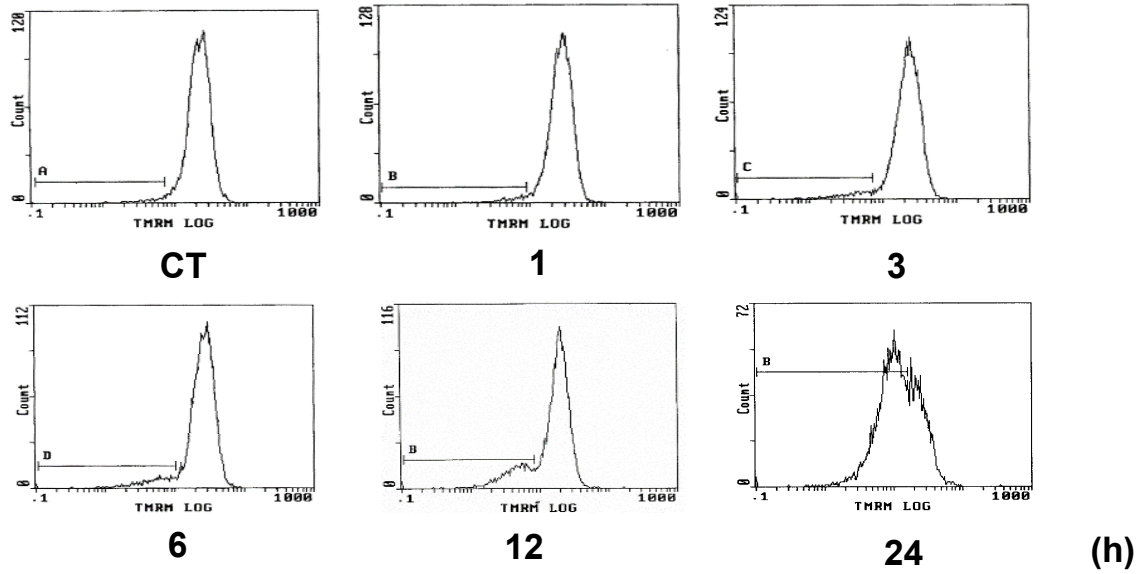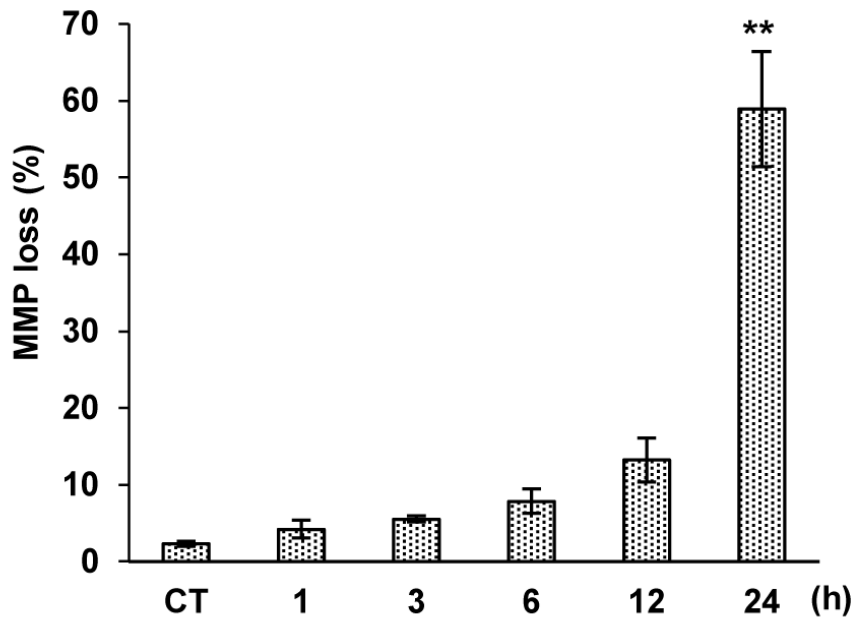

**Supplementary Fig. 2.** Effect of 3OTPCA on mitochondrial membrane potential (MMP). (A) Typical histogram and (B) the percentage of MMP loss in U937 cells. Cells were treated with 40  $\mu$ M 3OTPCA for 0, 3, 6, 12, and 24 h. Then, cells were harvested and incubated with 10 nM TMRM for 15 min at 37°C in PBS containing 1% FBS. The fluorescence of TMRM was analyzed using a flow cytometer (excitation at 488 nm; emission at 575 nm). The data represent the mean  $\pm$  SD (N = 3). \*\* $p$  < 0.01 vs. CT (Student's t-test).
