# Supplementary material for: 3-O-trans-p-coumaroyl-alphitolic acid, a triterpenoid from Zizyphus jujuba, leads to apoptotic cell death in human leukemia cells through reactive oxygen species production and activation of the unfolded protein response
Source: PubMed Central journal article supplement (PMC5568338; doi:10.1371/journal.pone.0183712), 2017-08-23
Supplement: pone.0183712.s003.pdf [file pone.0183712.s003.pdf]

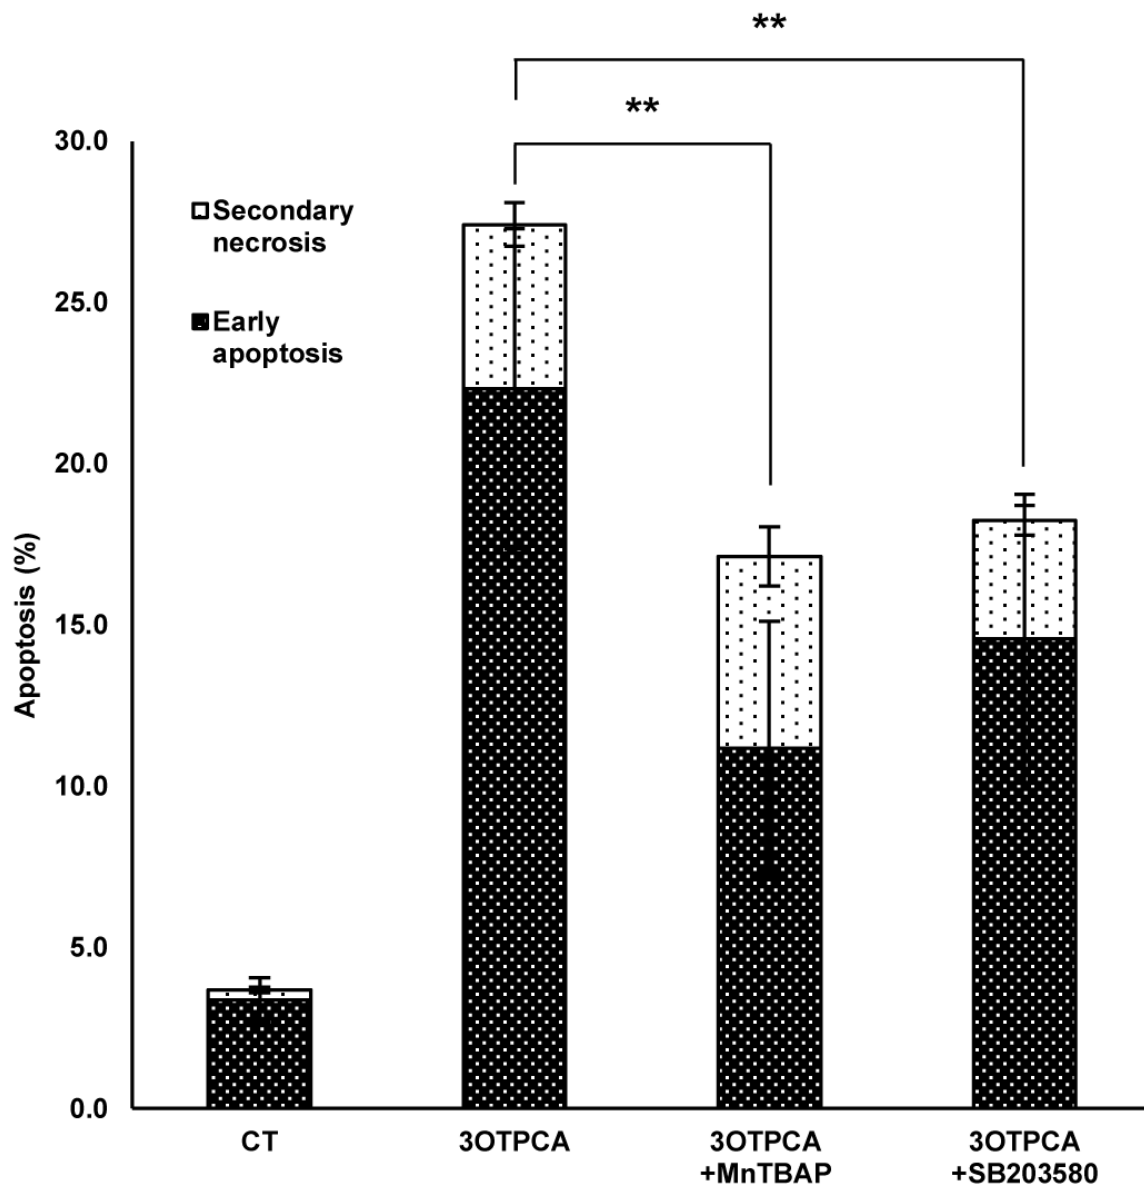

**Supplementary Fig. 3.** Effects of MnTBAP and SB203580 on 3OTPCA-induced phosphatidylserine externalization in U937 cells. Cells were pre-incubated with 100  $\mu$ M MnTBAP or 100  $\mu$ M SB203580 for 1 h and then co-incubated with 40  $\mu$ M 3OTPCA for 12 h. Cells were stained with annexin V-FITC and PI followed by flow cytometry. The data represent the mean  $\pm$  SD (N = 3). \*\* $p$  < 0.01 vs. CT (Student's t-test).
